# Supplementary material for: Translational and posttranslational regulation of XIAP by eIF2α and ATF4 promotes ER stress–induced cell death during the unfolded protein response
Source: PubMed Central journal article supplement — Mol Biol Cell. 2014 May 1;25(9):1411–20. doi: 10.1091/mbc.E13-11-0664 (PMC4004591; doi:10.1091/mbc.e13-11-0664), 2014-05-01
Supplement: supp_E13-11-0664v1_CombinedSupMats.pdf [file supp_E13-11-0664v1_CombinedSupMats.pdf]

# Supplemental Materials

*Molecular Biology of the Cell*

Hiramatsu et al.

**Supplemental Figure 1.** Defective *Chop* induction in ATF4<sup>-/-</sup> MEFs. ATF4(+/<sup>+</sup>)<sup>Fv2E-PERK</sup> and ATF4(-/<sup>-</sup>)<sup>Fv2E-PERK</sup> MEFs were treated with 1 nM AP20187, and *Chop* mRNA levels were quantified by qPCR.

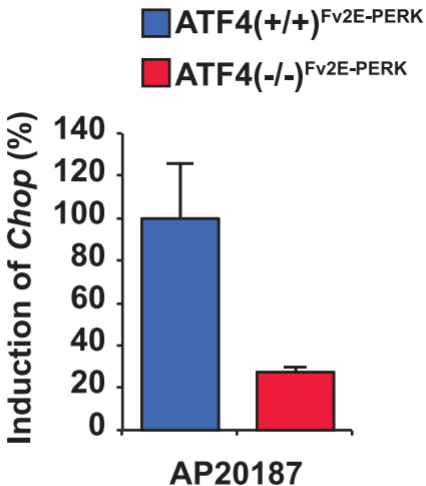

***Supplemental Figure 1***
